# Supplementary material
Source: Springer Nature journal article supplement (https://www.springermedizin.de/resource/supplementary/12974_2010_311_MOESM3_ESM.pdf/9601424)

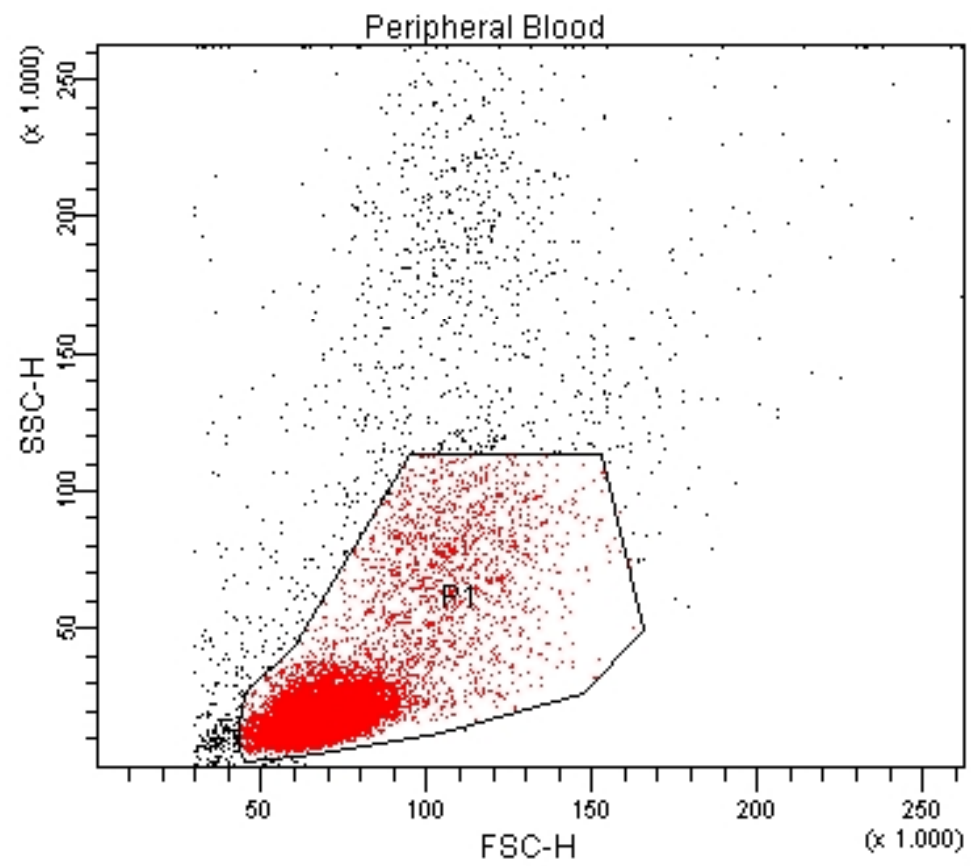

Supplement: MOESM3 [file 9601424]
